# Supplementary material for: One-step synthesis of ordered mesoporous CoAl2O4 spinel-based metal oxides for CO2 reforming of CH4
Source: Royal Society of Chemistry journal article supplement (doi:10.1039/c5ra07249b), 2015-01-01
Supplement: c5ra07249b1.pdf [file c5ra07249b1.pdf]

## One-step synthesis of ordered mesoporous $\text{CoAl}_2\text{O}_4$ spinel based metal oxides for $\text{CO}_2$ reforming of $\text{CH}_4$

Leilei Xu <sup>a, b</sup>, Jian Zhang <sup>a</sup>, Fagen Wang <sup>a, d</sup>, Kaidi Yuan <sup>c</sup>, Liangjun Wang <sup>c</sup>, Kai Wu <sup>b, e</sup>,  
Guoqin Xu <sup>a, b, d</sup>, Wei Chen <sup>a, b, c, d\*</sup>

<sup>a</sup> Department of Chemistry, National University of Singapore, 3 Science Drive 3, 117543, Singapore

<sup>b</sup> Singapore-Peking University Research Center for a Sustainable Low-Carbon Future, 1 CREATE Way, #15-01, CREATE Tower, Singapore 138602, Singapore

<sup>c</sup> Department of Physics, National University of Singapore, 2 Science Drive 3, 117551, Singapore

<sup>d</sup> National University of Singapore (Suzhou) Research Institute, Suzhou, China

<sup>e</sup> College of Chemistry and Molecular Engineering, Peking University, Beijing 100871, China

\*Corresponding author: Tel: 65-6516 2921; Fax: 65-6777 6126.

E-mail: [phycw@nus.edu.sg](mailto:phycw@nus.edu.sg)

### Figure captions:

**Figure S1.** Nitrogen adsorption-desorption isotherms ((**1**), (**3**)) and pore size distribution curves ((**2**), (**4**)) of the as-reduced catalysts.

**Figure S2.** TEM and SAED images of the as-reduced OMA- $x$ Co catalysts: (**a**) and (**b**) OMA-3Co, (**c**) and (**d**) OMA-5Co, (**e**) and (**f**) OMA-10Co.

**Figure S3.** Nitrogen adsorption-desorption isotherms (**1**) and pore size distribution curves (**2**) of the 60 h spent catalysts.

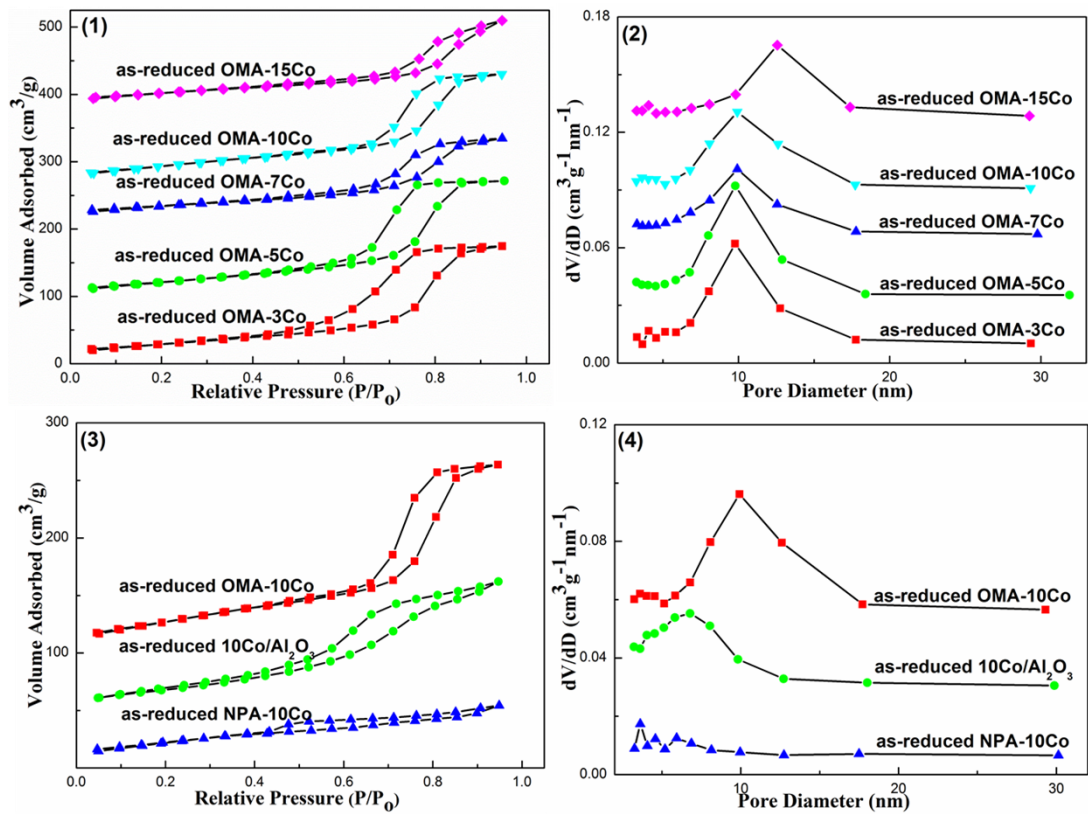

Figure S1

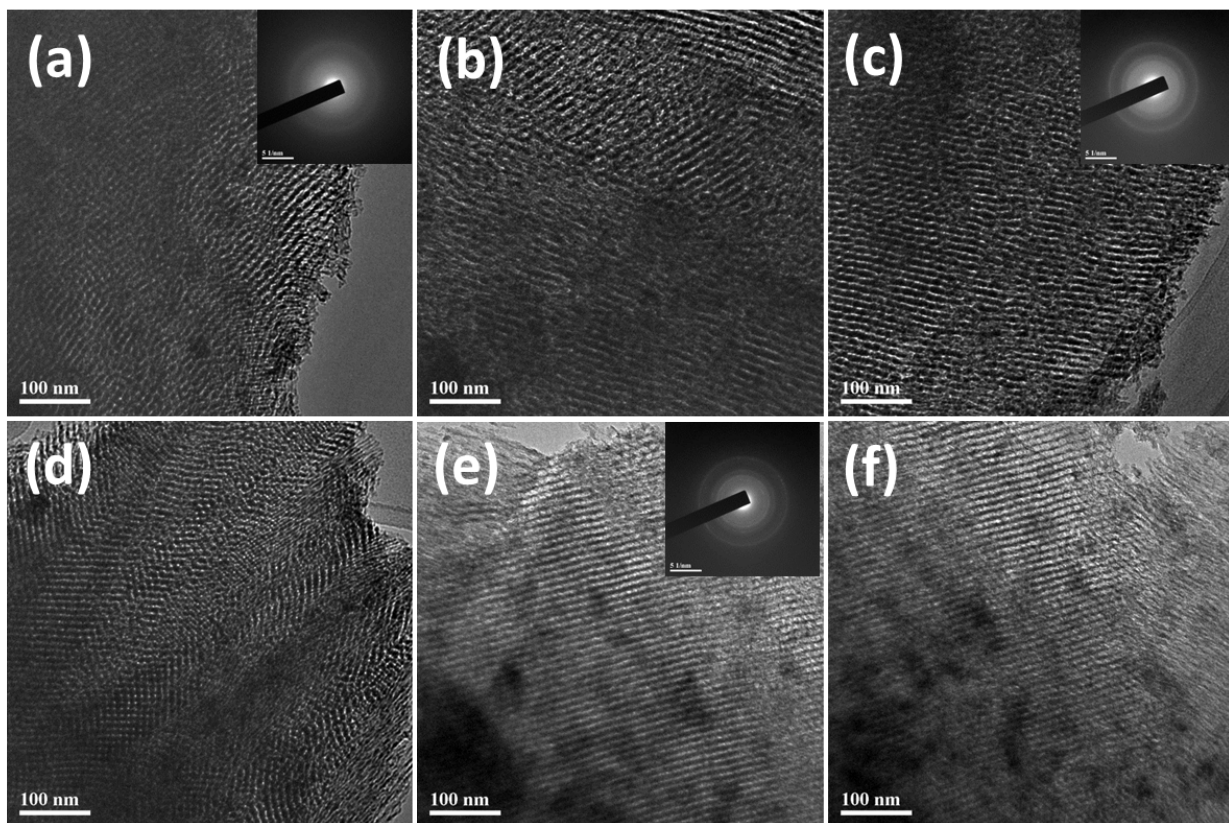

Figure S2

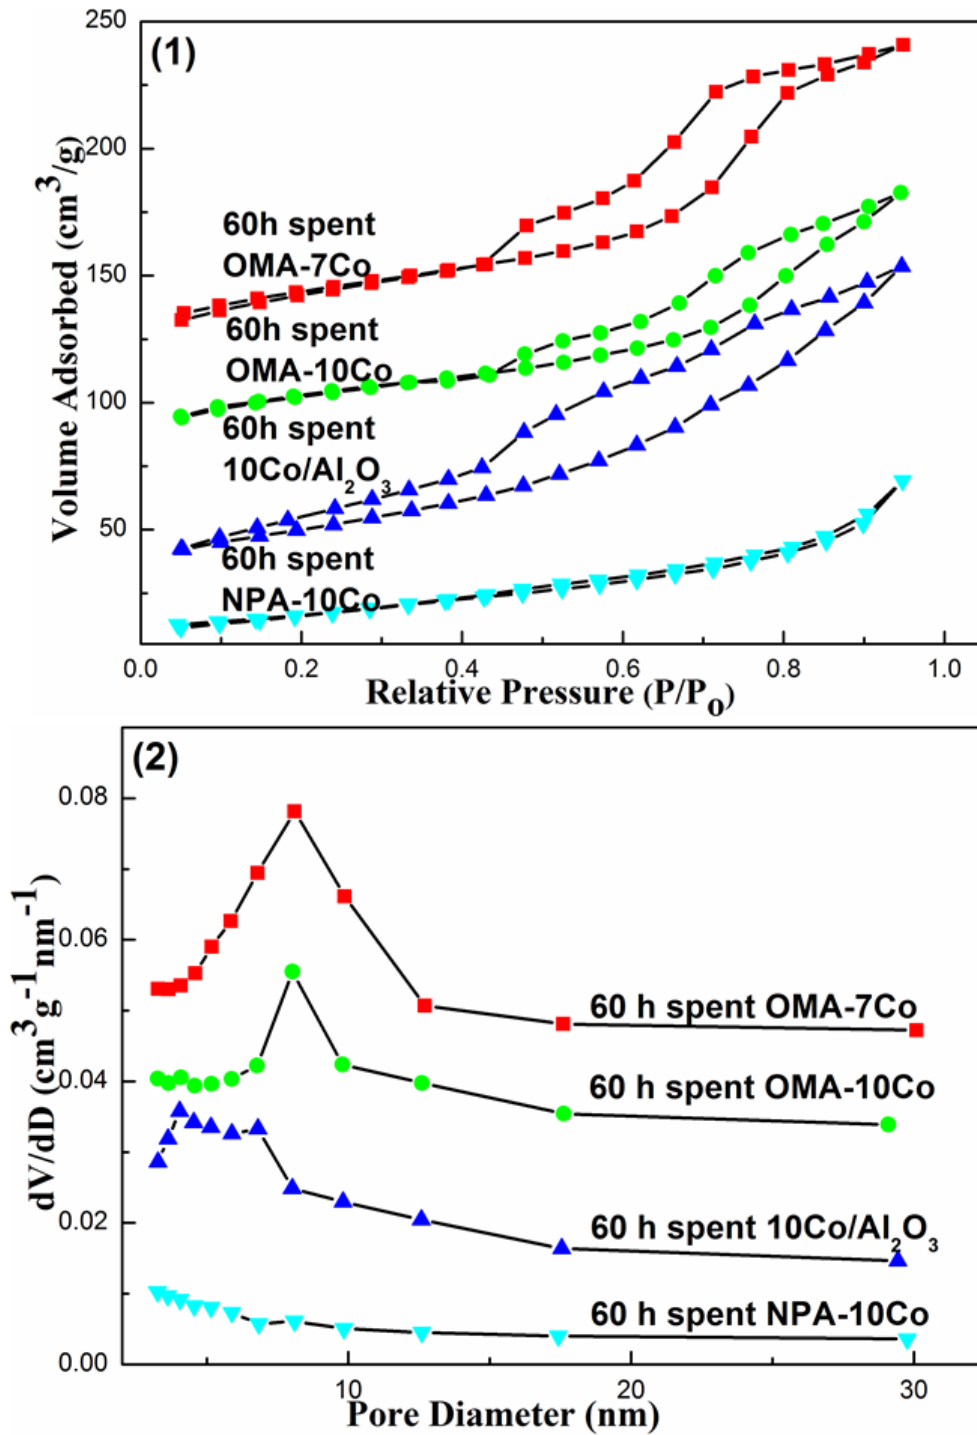

Figure S3
